# Supplementary material for: Ionized Jet Deposition of Calcium Phosphates-Based Nanocoatings: Tuning Coating Properties and Cell Behavior by Target Composition and Substrate Heating
Source: MDPI journal article supplement (doi:10.3390/nano13111758), 2023-05-29
Supplement: s1 [file s1]

## Supplementary Material

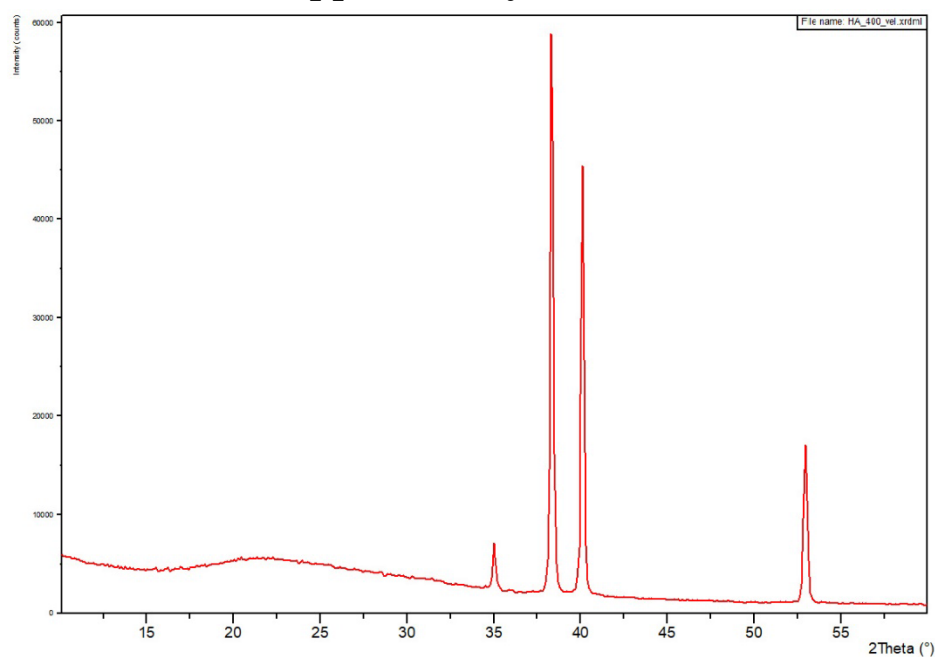

**Figure S1** – XRD pattern of HA-c-T400. The peaks are attributed to Ti from the metallic substrate (ICDD card# 01-089-3725)

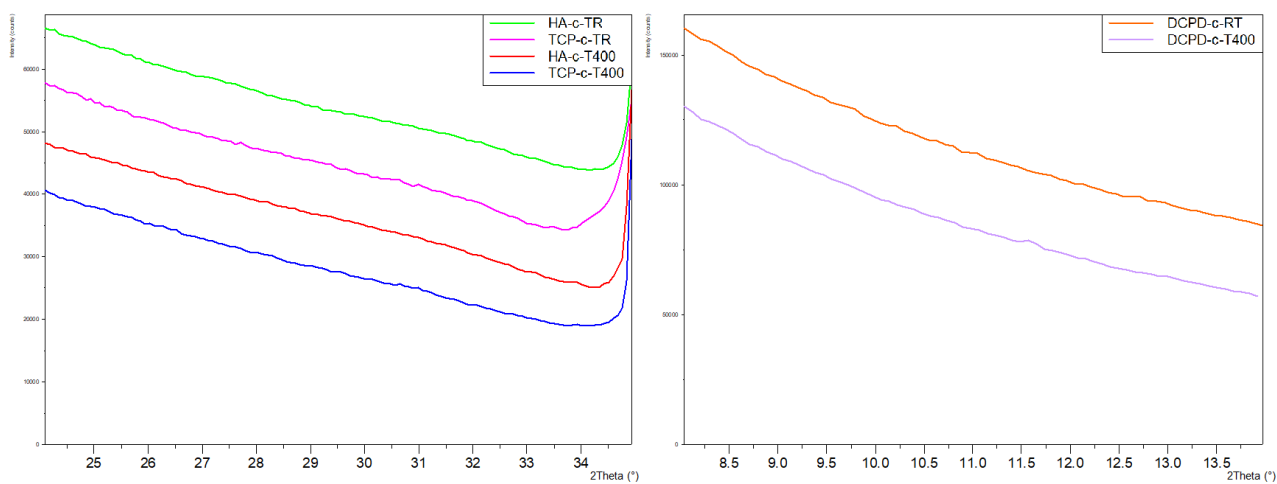

**Figure S2** – XRD pattern of coatings collected for longer collection times in the relevant range of 2θ degrees.

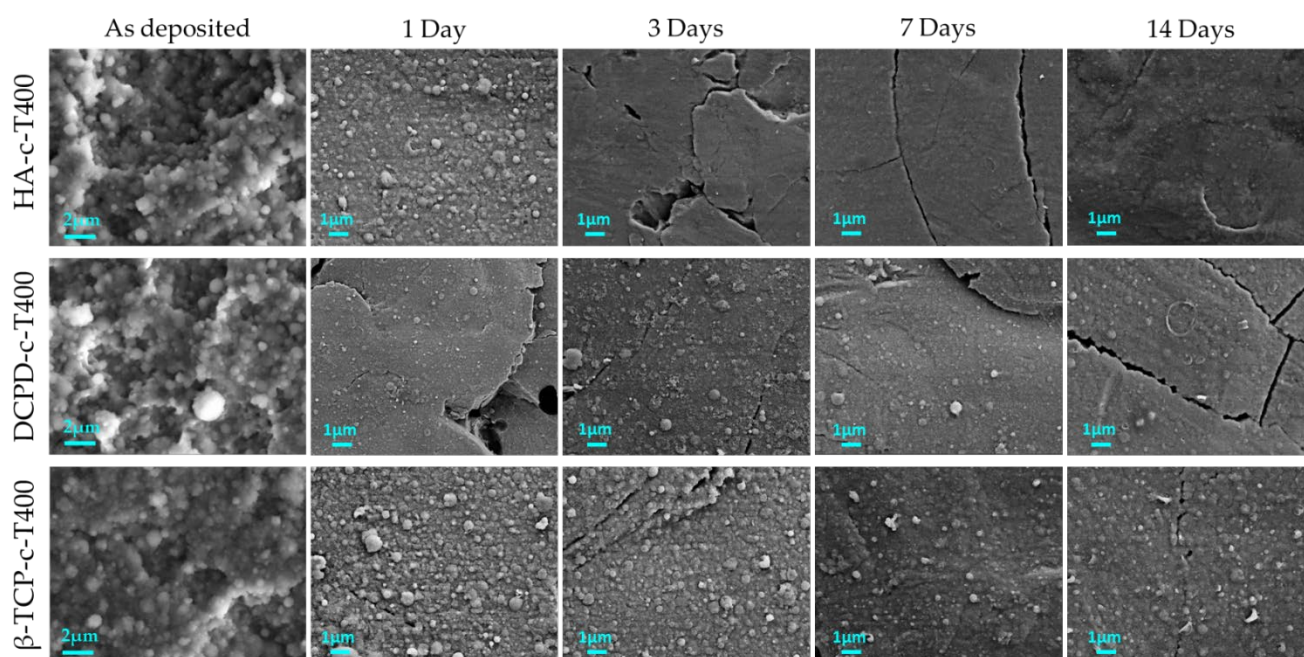

**Figure S3** - Morphology of the CaP coatings before treatment (first column), and after 1 (second column), 3 (third column), 7 (fourth column) and 14 days (last column) immersion in medium.
